# Supplementary material
Source: Springer Nature journal article supplement (https://www.springermedizin.de/resource/supplementary/13223_2013_412_MOESM2_ESM.pdf/9596624)

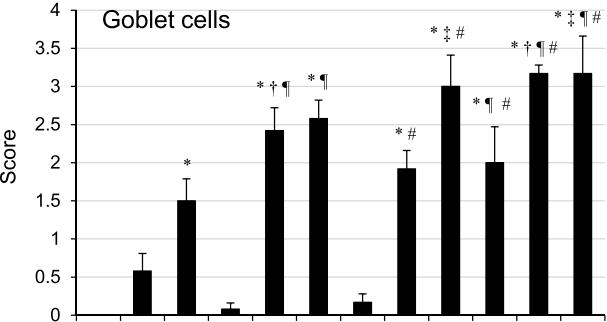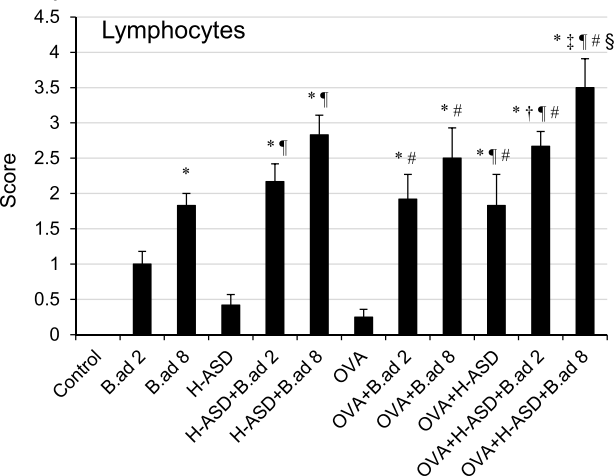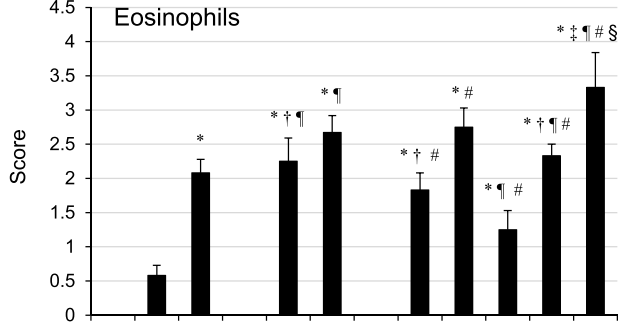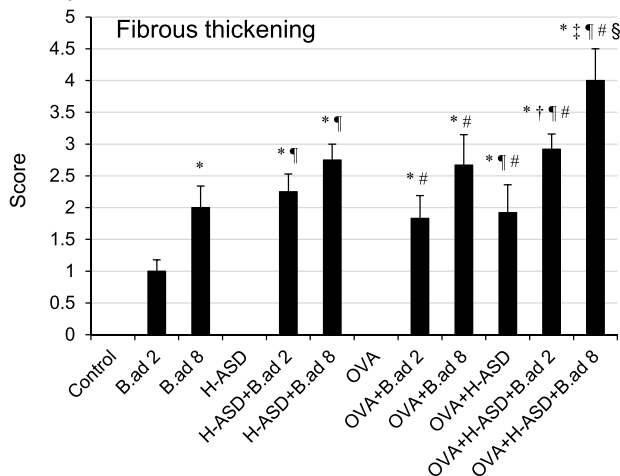

Supplement: MOESM2 [file 9596624]
